# Supplementary material
Source: MDPI journal article supplement (https://www.mdpi.com/2673-8112/3/12/120)
Supplement: s1 [file s1]

Archive with 1 entries (1 files):
- covid-2746640-supplementary.pdf
