# Supplementary material
Source: MDPI journal article supplement (https://www.mdpi.com/2673-8112/3/12/120)
Supplement: s1 [file s1 › covid-2746640-supplementary.pdf]

Q1 Please select the option that best describes how the activity improve your skills in the following areas:

|                                                                            | Excellent (1)         | Good (2)              | Fair (3)              | Insufficient (4)      | Deficient (5)         |
|----------------------------------------------------------------------------|-----------------------|-----------------------|-----------------------|-----------------------|-----------------------|
| Improvement of ability to do a literature survey (1)                       | <input type="radio"/> |
| Improvement of ability to select an instrument for a specific analysis (2) | <input type="radio"/> |
| Improvement of ability to design an experiment (3)                         | <input type="radio"/> |
| Improvement of ability to calculate and prepare standards (4)              | <input type="radio"/> |
| Improvement of ability to solve unexpected experimental problems (5)       | <input type="radio"/> |
| Improvement of ability to analyze data (6)                                 | <input type="radio"/> |
| Improvement of ability to pursue a research topic (7)                      | <input type="radio"/> |
| Improvement of laboratory skills (8)                                       | <input type="radio"/> |

---

Q2 What is your perception of difficulty for the whole activity?

- ☐ Extremely easy (1)
  - ☐ Somewhat easy (2)
  - ☐ Neither easy nor difficult (3)
  - ☐ Somewhat difficult (4)
  - ☐ Extremely difficult (5)
- 

Q3 What is your preferred delivery method for lab?

- ☐ Face-to-face lab (1)
  - ☐ Virtual lab (2)
  - ☐ Mix of face-to-face and virtual lab (3)
- 

Q4 What is your preferred delivery method for lecture and virtual lab?

- ☐ Synchronous - online sessions conducted at scheduled course time (1)
- ☐ Asynchronous - online work done at your own pace (2)
- ☐ Mix of synchronous and asynchronous instruction (3)

Q5 Please pick the option that is the more effective in improving the following skills:

| Virtual lab (1)       |                                                                | Face-to-face lab (2)  |
|-----------------------|----------------------------------------------------------------|-----------------------|
| <input type="radio"/> | Literature survey (1)                                          | <input type="radio"/> |
| <input type="radio"/> | Instrument selection based on project (2)                      | <input type="radio"/> |
| <input type="radio"/> | Experimental design (3)                                        | <input type="radio"/> |
| <input type="radio"/> | Physical preparation skills (calibration/create standards) (4) | <input type="radio"/> |
| <input type="radio"/> | Troubleshooting (5)                                            | <input type="radio"/> |
| <input type="radio"/> | Data analyses (6)                                              | <input type="radio"/> |
| <input type="radio"/> | Laboratory skills (7)                                          | <input type="radio"/> |

Q6 Please select the option that best describes your attitude or perception:

|                                                                               | Strongly agree<br>(1) | Somewhat<br>agree (2) | Neither agree<br>nor disagree<br>(3) | Somewhat<br>disagree (4) | Strongly<br>disagree (5) |
|-------------------------------------------------------------------------------|-----------------------|-----------------------|--------------------------------------|--------------------------|--------------------------|
| Virtual lab can replace face-to-face lab. (1)                                 | <input type="radio"/> | <input type="radio"/> | <input type="radio"/>                | <input type="radio"/>    | <input type="radio"/>    |
| Virtual lab is good supplement to face-to-face lab. (2)                       | <input type="radio"/> | <input type="radio"/> | <input type="radio"/>                | <input type="radio"/>    | <input type="radio"/>    |
| Virtual lab is suitable in learning concepts. (3)                             | <input type="radio"/> | <input type="radio"/> | <input type="radio"/>                | <input type="radio"/>    | <input type="radio"/>    |
| Virtual lab fosters self-regulated learning. (4)                              | <input type="radio"/> | <input type="radio"/> | <input type="radio"/>                | <input type="radio"/>    | <input type="radio"/>    |
| This activity improves my motivation to learn chemistry. (5)                  | <input type="radio"/> | <input type="radio"/> | <input type="radio"/>                | <input type="radio"/>    | <input type="radio"/>    |
| This activity enhances my understanding of theory learned from lectures. (6)  | <input type="radio"/> | <input type="radio"/> | <input type="radio"/>                | <input type="radio"/>    | <input type="radio"/>    |
| This activity enhances my experimental skills learned from in-person lab. (7) | <input type="radio"/> | <input type="radio"/> | <input type="radio"/>                | <input type="radio"/>    | <input type="radio"/>    |

---

Q6 What are the things you like about virtual lab activity?

---

---

Q7 What are the things you DO NOT like about virtual lab activity?

---

---
